**Full title: Process of Use of Evidence Products by Frontline  
Maternal, Newborn and Child Health Staff at the Facility Level  
in Ghana.**

**Short title: Process of Use of Evidence Products**

Gordon Abekah-Nkrumah<sup>1</sup>, Doris Ottie-Boakye<sup>2</sup>, Richmond Owusu<sup>3</sup>, Johnson Ermel<sup>4</sup>,  
Sombié Issiaka<sup>4</sup>, Anita Asiwome Adzo Baku<sup>1</sup>

1. Department of Public Administration and Health Services Management, University of Ghana Business School, P. O. Box 72, Legon- Accra.
2. Regional Institute for Population Studies, University of Ghana. P. O. Box LG 96, Legon, Accra-Ghana
3. School of Public Health, University of Ghana. P. O. Box LG 13, Legon, Accra-Ghana
4. Professional Assistant in research, West African Health Organisation, 01 BP 153 Bobo-Dioulasso 01, Burkina Faso

P. O. Box LG 13, Legon, Accra-Ghana

\* Corresponding Author

Email: [riowusu@ug.edu.gh](mailto:riowusu@ug.edu.gh)

**NOTE: This preprint reports new research that has not been certified by peer review and should not be used to guide clinical practice.**

1    **Abstract**

2    Although the use of evidence products has been identified as beneficial in improving  
3    reproductive, maternal and child health, very little is known about the processes that facilitate  
4    the use of these evidence products by frontline Maternal, Newborn and Child Health and  
5    Reproductive and Child Health (RNCH/RCH) practitioners in decision-making on the issues  
6    that confront them in their line of work. This study explored the processes that facilitate the  
7    use of evidence products in reproductive, maternal and child health service provision in  
8    selected healthcare facilities in Ghana. Using a cross-sectional qualitative design, interviews  
9    of 24 frontline RNCH/RCH practitioners across 16 healthcare facilities in the Greater Accra,  
10   Eastern, and Ashanti regions of Ghana were conducted. The study employed a semi-structured  
11   interview guide modelled along the Action Cycle phase of the Knowledge-To-Action (KTA)  
12   framework, and the objectives of the study. Themes were built out of the transcribed data. The  
13   study revealed that the processes that facilitate the use of evidence products include problem  
14   identification activities (such as service evaluation, using accepted benchmarks, inadequate  
15   logistics for providing service and client feedback) and, adapting knowledge to their local  
16   context. The usual suspects of socio-cultural and health systems-related factors such as  
17   resource constraints and human factors were found to hinder the use of evidence products in  
18   providing RNCH/RCH services. The study contributes to knowledge by operationaliing the  
19   KTA, simplifying the concept of knowledge sustainability and makes it easy for adoption and  
20   implementation especially at the frontline. Appropriate interventions that rely on strong  
21   education to navigate the societal norms and beliefs that inhibit the uptake of evidence-based  
22   care by clients will be essential in improving the use of evidence to inform practice decisions.

23

24    **Keywords:** Evidence use, knowledge to action, maternal and child health, reproductive health

## 25 **Introduction**

26 The provision of quality maternal and child healthcare services is essential for reducing  
27 maternal, newborn and child morbidity and mortality globally. The World Health Organization  
28 (WHO) emphasizes the importance of evidence-based practice to improve maternal and child  
29 healthcare outcomes. Initiatives to improve maternal, newborn and child health (MNCH) and  
30 reproductive and child health (RCH) cut across several dimensions and include the Sustainable  
31 Development Goals (SDGs). The SDGs seek to reduce the number of maternal deaths per  
32 100,000 live births globally to less than 70, reduce neonatal mortality to as low as 12 per 1,000  
33 live births and under-5 mortality to at least 25 per 1,000 live births by 2030 (1).

34

35 Since the introduction of these ambitious goals, considerable progress has been made globally  
36 in terms of maternal and child health. In Ghana for example, the Ghana Maternal Health Survey  
37 2017 estimated maternal mortality ratio as 310 per 100,000 live births, with under-5 and  
38 neonatal mortality reducing to 52 per 1000 live births and 25 per 1000 live births respectively  
39 (2). Likewise, approximately 89% of pregnant women had at least 4 antenatal clinic visits with  
40 skilled birth attendance reported as 79%. Despite the significant progress made within the past  
41 two decades, recent data suggests that maternal deaths contributed to 14% of all deaths in  
42 Ghana from direct and indirect causes (2,3). It is in the context of improving such adverse  
43 MNCH/RCH outcomes that the use of evidence products (existing research, policies,  
44 guidelines, protocols etc.) by frontline MNCH/RCH staff to inform decision-making is viewed  
45 as a step to improve quality and consequently cost-effectiveness.

46 Maternal healthcare staff play a critical role in ensuring safe and effective maternal care. The  
47 utilization of evidence products requires healthcare providers to incorporate the best available  
48 evidence with their clinical expertise and patients' preferences. Nonetheless, research indicates  
49 that healthcare staff often rely on their personal experiences, thereby under-utilizing available

50 evidence products when making clinical decisions (4–6). The use of evidence-based products  
51 provides benefits of standardized care, and scientifically proven evidence-based information  
52 to improve upon clinical decision-making and enhance the quality of care and outcomes for  
53 patients (7–9). Although evidence products have been proven to be beneficial and effective in  
54 guiding clinical practice, literature reports that frontline health workers underutilize them and,  
55 hence do not realize the associated benefits and impact (3–5), especially in terms of quality of  
56 care improvement (10–14). Previous studies have highlighted that selected sub-Saharan  
57 countries have limited use of clinical guidelines by healthcare workers [15-17].

58 Notwithstanding the low utilisation of evidence products for clinical decisions, existing research  
59 on evidence product utilization especially in the African context seems to focus more on  
60 policymakers at the national level rather than the frontline staff at the health facility level. For  
61 example, a search through the Ghanaian literature on MNCH/RCH evidence used by frontline  
62 health staff found only three papers in Ghana (15–17). Whereas the first paper (15) was on  
63 decision-making in general, the third paper (17) examined the determinants of evidence use by  
64 frontline MNC/RCH staff. Thus, except the second paper (16), there is currently no study that  
65 focuses on the process that facilitates the use of evidence products (existing research, policies,  
66 guidelines, protocols etc.) to inform decision-making by frontline MNC/RCH staff.

67  
68 This paper therefore seeks to examine processes that facilitate the use of evidence products  
69 (existing research, policies, guidelines, protocols etc.) for care decision-making by frontline  
70 MNCH/RCH staff in selected health facilities. Specifically, the study:

- 71 • Examines the nature and importance of the use of evidence products by frontline  
72 MNCH/RCH staff in selected health facilities in Ghana.
- 73 • Examines processes that facilitate the use of evidence products by frontline  
74 MNCH/RCH staff in selected health facilities in Ghana to support practice decisions.

75

## 76 **Theoretical Framework**

77 The current paper examines processes that facilitate the use of evidence products by frontline  
78 MNCH/RCH staff to support practice decisions. There are several models used to explain the  
79 process of translating knowledge (evidence) to support decision-making. The Knowledge-to-  
80 Action (KTA) Framework (see Fig 1) developed by Graham and colleagues (18) remains one  
81 of the most highly cited in the literature. The KTA framework is based on a system's theory  
82 assumption, and it argues that knowledge producers and users operate in a knowledge system  
83 that is responsive, and adaptive but unpredictable. The KTA framework is divided into two  
84 distinct but related phases, namely; the Knowledge Creation phase and the Action Cycle phase  
85 (19). The Knowledge Creation phase acts like a funnel and puts knowledge into usable units,  
86 starting with knowledge inquiry (health research literature) to knowledge synthesis (systematic  
87 reviews, and meta-analyses) and knowledge products/tools such as best practice guidelines and  
88 protocols, clinical pathways or decision aids and videos (19). The Action Cycle of the KTA  
89 framework is iterative and involves steps needed for a unit of knowledge to reach widespread  
90 use to change behaviour and or attitudes. This includes the identification of a problem (i.e.  
91 identification, review and selection of knowledge), adapting knowledge to the local context  
92 (individual practice setting or particular patient), assessment of facilitators or barriers to  
93 knowledge use in a particular situation, selection and implementation of interventions to fit the  
94 local context, monitoring the use of knowledge, evaluation of outcomes and finally,  
95 implementation of systems to sustain the use of knowledge (18,19).

96

97

## 98 **Insert Fig 1: Knowledge to Action Framework**

99 Source: adopted from Graham et al. (18)

100

101 Given that the study focuses on the use of existing evidence products to inform decision-  
102 making by frontline MNCH/RCH staff, we assume that knowledge already exists and that what  
103 constitutes a challenge is processes that facilitate the use of existing knowledge (i.e., research  
104 evidence, protocols, guidelines etc) to inform practice decisions. Thus, the use of the KTA  
105 framework in the context of this study is limited to the Action Cycle phase, starting from  
106 problem identification through to sustenance of knowledge use. The components of the Action  
107 Cycle phase are further discussed below.

108

109 **Problem Identification** – Although the Action Cycle is iterative, problem identification is  
110 normally recommended as the starting point for the deliberate application of knowledge to  
111 change behaviour and attitude. It compares current practice with existing knowledge to  
112 ascertain whether there is a practice gap that needs to be addressed(7,20).

113

114 **Adapting Knowledge to Local Context-** This step of the Action Cycle focuses on how  
115 existing knowledge could be organised to ensure that it is useful and appropriate to a specific  
116 circumstance (21,22). For example, it is argued that adapting existing clinical practice  
117 guidelines to fit local circumstances is not merely good for improving the relevance of the  
118 guidelines but also serves to improve ownership by end-users (23). Notwithstanding, there is  
119 equally the risk that adapted guidelines may deviate from the original evidence that informed  
120 the development of the guidelines (24).

121

122 **Assessment of Barriers and Facilitators to Knowledge Use** – This focuses on factors that  
123 influence (promote or constrain) the uptake of knowledge. Three main factors have been  
124 identified as influencing the use of evidence in the context of healthcare. For example, while

125 Majid et al. (25) categorised the factors under knowledge and attitudes, Humphries et al. (26)  
126 classified the factors as information, organisational structure and processes, organisation  
127 culture and individual interactions. Other authors have classified such constraints or facilitators  
128 as related to organisational support and organisational change (27), personal attitudes,  
129 availability of resources and knowledge and skills (28) and attitudes and knowledge (29).

130

131 **Select, Tailor and Implement Interventions** – This is a three-part process that deals with the  
132 actual planning and implementation of an intervention (use of evidence) to bring about an  
133 intended change (30). The first part focuses on selecting effective interventions. However,  
134 given the possibility that different contexts may respond differently to the same interventions,  
135 tweaking interventions to fit the specific circumstances of different contexts can be key to  
136 success. The final part of this process is the actual implementation of the selected intervention.  
137 To ensure that the selected intervention produces the intended change, it should not only be  
138 effective but must also fit the specific circumstance of the context in question.

139

140 **Monitoring of Knowledge Use** – This component helps stakeholders to know whether the  
141 implementation of the interventions as discussed in the previous stage has resulted in the  
142 anticipated change. The monitoring focuses on three areas; whether there has been a change?  
143 The extent of the change and the factors accounting for the change. The monitoring can be  
144 done using robust scientific evaluation methods either qualitatively or quantitatively.

145

146 **Sustain Knowledge Use** – The importance of this phase is based on the assumption that  
147 successful interventions may not up-scale themselves unless systematic steps are undertaken  
148 to let it happen. This phase therefore focuses on taking systematic steps to ensure that positive  
149 changes occurring as a result of the implementation of the knowledge intervention are scaled

150 up. It is suggested that factors such as perceived benefits and risks, relevance, leadership, policy  
151 integration, resources and politics are some of the factors that can aid the scaling up and  
152 sustenance of knowledge use (7,18,20,21).

153

## 154 **Methods**

### 155 **Study Design**

156 The study used a cross-sectional qualitative design and targeted frontline healthcare workers  
157 involved in the provision of MNCH/RCH services (medical doctors, nurses, midwives, public  
158 health officers, enrolled nurses, registered general nurses, and community health nurses) in 16  
159 health facilities in 3 regions (Greater Accra, Ashanti and Eastern Regions). The health facilities  
160 were carefully selected to include those in rural and urban areas as well as areas that do not  
161 have demographic surveillance sites to reduce the possibility of contamination from the effect  
162 of demographic surveillance activities.

163

### 164 **Sampling Method**

165 The choice of the Greater Accra, Ashanti and Eastern regions is based on the fact that they  
166 have the highest population of health facilities in addition to having different types (ownership  
167 and hierarchy) of health facilities. Using willingness to participate in the study, 16 health  
168 facilities were selected from the 3 regions. This includes (a) Ashanti: 1 Community Health  
169 Planning and Services (CHPS), 1 Health Center, 2 District Hospitals and 1 Regional Hospital;  
170 (b) Greater Accra: 1 CHPS, 3 Health Centers, 3 Regional Hospitals, 1 Tertiary Hospital and  
171 (c) Eastern: 2 Quasi-Government Hospitals and 1 District Hospital. From the 16 health  
172 facilities, 24 respondents were selected for the interview based on their willingness to  
173 participate and knowledge of the MNCH/RCH system in the respective health facilities.

174



## 175 **Data Collection and Analysis**

176 A semi-structured interview guide was developed and used to collect data for examining  
177 processes that facilitate the use of evidence products by frontline MNCH/RCH staff to inform  
178 practice decisions. The interview guide contained specific questions that captured the socio-  
179 demographic characteristics of respondents and how key domains of the Action Cycle phase  
180 of the KTA framework (identification of a problem, adapting knowledge to the local context,  
181 assessment of barriers or facilitators to knowledge use in a particular situation, selecting and  
182 implementing interventions to fit local context, monitoring the use of knowledge, evaluating  
183 outcomes, and finally, implementing systems to sustain the use of knowledge) are deployed to  
184 facilitate the use of evidence products by frontline MNCH/RCH staff (18,19). The semi-  
185 structured interview guide is attached as supplementary material (S1 File).

186

187 All the interviews were carried out with the assistance of a trained interviewer and a field  
188 assistant. All interviews were audio-recorded, in addition to copious hand-written notes taken  
189 by the interviewer and her assistant. The audio recordings were transcribed word-for-word into  
190 a Microsoft Office Word document. The transcripts were compared with the hand-written notes  
191 and identified inconsistencies were corrected. The final transcripts were thoroughly reviewed  
192 by the interviewer and her assistant to ensure that the content of the transcripts was a true  
193 reflection of the answers or discussions with interview respondents. Using similarities and  
194 differences in respondents' answers, information in the transcripts was grouped into broad  
195 themes and sub-themes in line with the objectives of the study. The broad themes and sub-  
196 themes formed the basis of what is presented in the findings.

197

## 198 **Ethical Consideration**

199 Ethical clearance for the study was sought from the Ghana Health Service Ethics Review with  
200 clearance number GHS-ERC010/05/18. Additional administrative approval was taken from  
201 relevant regional and district Directors of Health Services as well as heads of participating  
202 health facilities. Informed consent was obtained from all the study participants. All participants  
203 provided written consent.

204

## 205 **Results**

### 206 **Characteristics of Participants**

207 Study participants were made up of 6 males and 18 females. The relatively higher number of  
208 females is because more females work in MNCH/RCH compared to males. In terms of  
209 profession, 2 public health nurses, 3 enrolled nurses, 2 community health nurses, 8 midwives,  
210 5 senior/principal/nursing officers, 2 nutrition officers and 2 specialist obstetricians and  
211 gynaecologists participated in the study. Respondents also cut across various departments/units  
212 in the MNCH/RCH service delivery chain. These include 6 maternity/ANC wards, 5  
213 RCH/family planning units, 3 cervical cancer screening units, 2 public health units, and 1  
214 mother and baby unit. The rest include 2 respondents from the nutrition unit, 1 from the nursing  
215 unit, 2 from CHPS compounds and 2 consultants.

216

217 The findings are structured to respond to two main questions. First, what is the nature and  
218 importance of the use of evidence products by frontline MNCH/RCH staff, and secondly,  
219 processes that facilitate the use of evidence products by frontline MNCH/RCH staff to inform  
220 practice decisions.

221

### 222 **Nature and Importance of Use of Evidence Products**

223 The section discusses the types of MNCH/RCH services offered in the health facilities  
224 interviewed, sources of MNCH/RC-related evidence products and the importance of using  
225 evidence products in practice decision-making as follows.

226

### 227 **Scope of MNCH services offered**

228 Participants across the different levels of care irrespective of location (rural and urban) cited  
229 the key MNCH/RCH services offered by their health facilities as family planning services,  
230 postnatal care, nutrition care support, guidelines and rehabilitation, school and community  
231 health education, antenatal care services and delivery and labour services. Other services  
232 include cervical cancer screening, breast cancer screening, child welfare clinic services (CWC),  
233 adolescent health care services, sexually transmitted infection (STI) treatment and home visits.  
234 Neonatal and sick baby assessment and care, abortion care, and counseling were the least  
235 provided services. The findings indicate that the level of a health facility (primary care,  
236 secondary or tertiary) influences the type of MNCH/RCH service provided.

237

238

### 239 **Source of MNCH/RCH-related evidence products**

240 Study participants rely on diverse sources for evidence products to inform MNCH/RCH  
241 practice. Nine participants mentioned training received either through in-service or on the job.  
242 About 10 of the participants mentioned the Ghana Health Service (GHS) as their main source  
243 of evidence products (guidelines, frameworks, algorithms and protocols) for use in the  
244 provision of MNCH/RCH services. Respondents also indicated that workshops, school, health  
245 facility-initiated meetings (weekly and monthly meetings) and the District Health Directorate  
246 (DHD) as their main sources of evidence products. Others indicated that their colleague  
247 workers and the use of models (dummies) constitute their main source of MNCH/RCH

248 evidence products for their day-to-day decisions. Others mentioned development partners  
249 (UNICEF, WHO, JHPIEGO etc.). Ironically, only one rural participant cited online portals as  
250 one of the sources of MNCH/RCH-related evidence.

251

### 252 **Importance of evidence-based practice in MNCH/RCH service provision**

253 Respondents described the use of evidence products in MNCH/RCH practice as important,  
254 giving varied reasons. They argue that evidence-based MNCH/RCH practice does not only  
255 benefit service providers but also users of services. They suggest that it serves as a source of  
256 health education and helps to streamline healthcare for clients. They acknowledged that it  
257 makes their work easier and also puts them in a position to do the right things in service  
258 delivery. To some, it serves as a guide for training service providers. They mentioned that  
259 evidence-based MNCH/RCH practice helps to monitor service delivery, educate clients on  
260 service provision and finally serves as a tool for identifying and managing risk. This is captured  
261 by a respondent below:

262

263 *“They are very important because they serve as a guide to service providers, they also serve*  
264 *as a guide to monitor service delivery by the health service provider and also they serve as a*  
265 *guide for the training needs of health workers” - (Gynecologist, Regional hospital, Urban*  
266 *area).*

267

### 268 **Processes that Facilitate the Use of Evidence Products in Clinical Practice**

269 In this section, we discuss processes that facilitate the use of evidence products by frontline  
270 MNCH/RCH staff based on the components of the KTA framework.

271

272

273 **Problem identification**

274 As per the KTA framework, problem identification is about the identification of practice gaps  
275 to be addressed. The findings suggest that frontline MNCH/RCH staff work to identify practice  
276 gaps so as to improve their practice based on existing or new evidence. Problem identification  
277 is examined from the perspective of providers.

278

279 Respondents indicated that evaluation of the service provided, using accepted benchmarks,  
280 inadequate logistics for providing the service in question and clients' feedback on service  
281 rendered helps to identify service and practice gaps. Respondents also acknowledged that other  
282 sources of information for identifying practice gaps include, facility-level service performance  
283 data via the strategic planning framework (i.e., setting of targets, monitoring and evaluation  
284 and examination of case outcomes). On inadequate logistics, a Community Health Nurse in  
285 charge of a Reproductive and Child Health unit averred:

286 *“You are supposed to perform a procedure that requires that you have some logistics*  
287 *in place to be successful and yet not available. In that case, you should know that the*  
288 *outcome you seek you may not get it. This for me is a gap you need to address” -*  
289 *(Community Health Nurse, Health Centre, rural area).*

290

291 A nutrition officer in an urban hospital elaborated on the issue of monitoring and supervision  
292 in identifying gaps as follows:

293

294 *“We go to the various Units to see if they are practicing what they have been taught.*  
295 *For instance, how to initiate breast feeding. We ask the mothers when we go to the ANC*  
296 *or the RCH unit. ...if the mother is not able to breastfeed, we do ask, were you taught*  
297 *when you were pregnant or when you gave birth, were you helped to position the baby*

298 *so that we will know whether what you taught the staff is being practiced or maybe it*  
299 *didn't go down well.”- (Nutrition Officer, Hospital, urban area).*

300 Another study participant on the use of existing reports from documentation also highlighted:

301 *“Whatever you do for a client, you document. So, per what the health personnel has*  
302 *documented, you will know that he/she is on course with the protocol or is deviating*  
303 *from the protocol” – (Midwife, CHPS compound, rural area).*

304

305 On the problem identification using client's feedback, study participants reported that the  
306 condition of clients at visit, clients' vital statistics, clients' adherence to recommended service  
307 use, service outcomes etc. are key in helping them to identify knowledge or evidence gaps in  
308 their practice. The pathways to identifying gaps in the use of evidence in clinical practice were  
309 summarized by a respondent as follows:

310

311 On clients' vital statistics, an enrolled nurse in an urban health center said:

312 *“We do the tracing in the antenatal card when they visit every day. So, let's say, the*  
313 *person came last month and her BP was 100/70, which of course is in a normal range,*  
314 *and then the weight was 90. Then the next month she comes, the BP has risen to say,*  
315 *150/90 and then the weight may be has deteriorated to say 80 or 75, then we know there*  
316 *is a problem.”- (Enrolled Nurse, Health Center, Urban area).*

317

### 318 **Adapting knowledge to local context**

319 Study participants averred that using knowledge or evidence products in their original form  
320 should be the gold standard. Nonetheless, there are context-specific challenges that sometimes  
321 require that existing or new evidence products (protocols, guidelines research evidence etc.)

322 are tweaked a little to suit local context and therefore enhance ownership and usage, albeit that  
323 adaptation has its challenges. The statement below from one of the respondents confirms the  
324 fact that frontline MNCH/RCH staff engage in actions that seek to adapt existing and new  
325 knowledge to suit their context.

326

327 *“.....What I’m trying to say is that it is not every case that the protocol works.*  
328 *Sometimes you have to adapt a standard on nutrition support care, other than that, the*  
329 *clinical outcomes for those cases will always be bad.”* - (Nutrition Officer, Hospital,  
330 Urban area).

331 It is important to emphasize that the extent to which one can adapt existing or new knowledge  
332 to the local context depends on the level of the health facility in question, and more importantly  
333 availability of resources. For example, a higher-level health facility with adequate staff, well  
334 trained on the protocol or guideline involved, will be able to adapt the protocol or guideline to  
335 their context better than a lower-level health facility without the required resources. This is  
336 captured by a respondent as follows:

337 *“So, when I go for the training or whoever goes for it, when you come, you train the*  
338 *people that you work with and then you equip them with the knowledge and make it*  
339 *simple to implement in our facility. But sometimes you don’t have the people to do the*  
340 *training well for everybody and that can be a problem”* - (Senior Nurse Officer,  
341 Hospital, urban area)

342

343 Additionally, the level of teamwork and collaboration among the provider team as well as  
344 community engagements, to a large extent determine the level of knowledge adaptation. The  
345 two statements below capture how knowledge adaptation is accomplished through teamwork,  
346 collaboration and community engagement:

347

348 *So, ideas are invited from all team members to draw the plan. After that, we just assign*  
349 *tasks to team members and later bring all our reports together. The reports help us to*  
350 *know whether we are being successful using the protocol or if there is a need to change*  
351 *something along the line - (Midwife, Hospital, Urban area)*

352

353 *“We work with community health volunteers on home visits and outreach or*  
354 *immunization or weighing or education. To get them to do what is in the protocols, we*  
355 *educate them in a way that will make them understand so they can do the work we want*  
356 *them to do. Sometimes it means using things available in the community to help them*  
357 *to understand.” - (Principal Community Health Nurse, Health Centre, Urban area)*

358

### 359 **Barriers to evidence use**

360 The findings suggest that there are inherent barriers to the use of evidence products by frontline  
361 MNCH/RCH staff in making daily practice decisions. These include client-related and health  
362 systems-related barriers which have been discussed in detail below.

363

### 364 **Client-related barriers**

365 Client-related factors that constrain the ability of frontline MNCH/RCH staff to use evidence  
366 products in their practice decisions include socio-cultural (societal norms and belief systems)  
367 and economic factors (access to resources and education). According to respondents, societal  
368 beliefs and norms manifest in ways such as women needing permission from their husbands or  
369 in some instances fear of accepting to utilize services crucial to securing better health outcomes  
370 for them. The quote below suggests that societal norms (e.g., a husband’s authority) are crucial  
371 to administering evidence-based life-saving interventions by frontline MNCH/RCH staff.



372

373 *“Most people when they come, you can see that it’s an emergency and you have to*  
374 *quickly attend to them. Some women will tell you that unless my husband comes, I can’t*  
375 *open myself naked before you. This is normal because there are some religious*  
376 *organizations and cultural beliefs that if you want to render the service if you want to*  
377 *even touch a client’s private part, the husband will have to be there to give consent. So,*  
378 *in that case, maybe if a protocol is given, do this and do that, you will realize that you*  
379 *will have to miss the first or second step”- (Public Health Nurse, Hospital - urban area).*

380

381 Poverty and low levels of education among clients also play a key role in the ability of frontline  
382 MNCH/RCH staff to utilize evidence in daily clinical decisions. The respondents explained  
383 that poverty creates affordability challenges (especially for medicines and diagnostics) making  
384 some clients opt for alternatives other than what has been prescribed for them by the  
385 MNCH/RCHS staff as per the quotes below.

386

387 *“The challenge we have is sometimes the women are not able to afford the laboratory*  
388 *services like the lab test, the screening and the Pap Smear. They don’t have the money*  
389 *to do it. Most of them come and say “I don’t have money, I will go and come” –*  
390 *(Midwife, Hospital, Urban area).*

391

392 Additionally, the respondents suggest that lower levels of education in the context of strong  
393 cultural beliefs manifest in fear and resistance to the adoption of evidence-based advice. For  
394 example, clients with non-communicable diseases like hypertension after receiving health  
395 education may not adhere to their medication regime, while in other cases, women may opt for  
396 family planning methods that may be detrimental to their health per available evidence. The  
quote from a public health nurse below explains this fact.

397

398 *“Sometimes the person is pregnant. You educate the person to eat those food items that*  
399 *you the health worker think are nutritious and will help the baby. But that is the same*  
400 *thing that the family, per their belief, thinks that a pregnant woman consuming such*  
401 *food items will give birth to an abnormal baby. So, these women are scared to consume*  
402 *such food items” - (Public Health Nurse, Hospital - Urban area)*

403

404

#### 405 **Health systems-related barriers**

406 Several health system factors as discussed below were suggested by respondents as constituting  
407 barriers to the use of evidence products by frontline MNCH/RCH staff.

408 ***Poor staff attitude towards the use of protocols*** - One of the health systems barriers indicated  
409 by study participants was poor staff attitude towards the use of protocols in providing  
410 MNCH/RCH services. Although health personnel have received training on the use of  
411 protocols for routine clinical care, some do not follow the procedure in service provision. In a  
412 hospital located in an urban area, one Senior Nursing Officer said:

413 *“Although you’ve taught everybody to go through the protocol, people will still not use*  
414 *it and will want to do whatever they want. They want to finish whatever they want to do*  
415 *quickly, either they are in a hurry, or they think it’s not necessary to go through the*  
416 *protocol” - (Senior Nursing Officer, Hospital, Urban area).*

417

418 ***Inappropriate use of protocol*** – This refers to cases where protocols are available in the facility  
419 but may not be accessible to those who may need them for their work. A Senior specialist  
420 Obstetrician and Gynecologist in an urban hospital pointed out:

421

422 *“Sometimes, some of the protocols are available and may be sitting in somebody’s*  
423 *office who is not the direct user. A good example is the standard treatment guideline,*  
424 *supposed to be in the consulting rooms. Some prescribers don’t have it and are neither*  
425 *trained on its use nor yet are supposed to use it. So that can be a barrier to its proper*  
426 *use.” - (Senior specialist Obstetrician and Gynecologist, Regional hospital, Urban*  
427 *area).*

428

429 **Resource constraints** - The use of evidence products to inform practice decisions requires  
430 resources. There are instances where protocols are made available without accompanying  
431 resources to make their use efficient and effective. This is not limited to urban facilities but  
432 also in rural settings. A Senior Specialist Obstetrician/Gynecologist emphasized:

433 *“Some of those protocols may require change of working tools, equipment etc. I believe*  
434 *that, well, we are trying but it can be better, it’s not completely there sometimes” -*  
435 *(Senior Specialist Obstetrician and Gynecologist, Regional Hospital, Urban area).*

436

437 **Limited staff strength** - Inadequate health personnel to provide MNCH/RCH services was also  
438 cited as a barrier to the use of evidence by frontline MNCH/RCH staff in both rural and urban  
439 facilities. According to them following protocols, guidelines and new evidence sometimes  
440 require not only time but also the requisite personnel. They argue that the challenge is even  
441 aggravated when they often work below the required staff norms in a time of increasing  
442 utilization. In this direction, a Public Health Nurse cited:

443 *“We are a big health facility with few staff. If you want to follow the protocols strictly,*  
444 *it takes time and the clients grumble. So, staffing is a problem” - (Public Health Nurse,*  
445 *Hospital - urban area).*

446

447 ***Conflict of MNCH/RCH protocols with other policies*** - Given the numerous protocols in  
448 MNCH/RCH care, the study found that some protocols are in sharp contrast with other existing  
449 healthcare policies. This puts service providers in a dilemma in the use of such evidence  
450 products to provide MNCH/RCH services to clients. One Midwife in a rural CHPS compound  
451 recounted:

452 *“When somebody comes to deliver, our protocol says you should give antibiotics to*  
453 *prevent any infection due to the issue of the placenta. If such a client comes with*  
454 *insurance (NHIS card), the insurance policy says that the level of the facility, (i.e.,*  
455 *CHPS zone) does not administer antibiotics. But, here in our CHPS zone too, people*  
456 *come here to deliver. So, what do we do?”* – (Midwife, CHPS compound - Rural area).

457 ***Inadequate training*** - Inadequate training was also cited as a barrier to the use of evidence in  
458 MNCH/RCH service provision. This they argued makes it difficult for health personnel to  
459 grasp the concepts in the protocols, guidelines etc. before their introduction. One study  
460 participant reported:

461 *“What I see as some of the barriers is inadequate training for health personnel to be*  
462 *acquainted with protocols, guidelines etc. early enough before their introduction. Not*  
463 *that they don’t do the training, but the training should be as early as possible before*  
464 *the introduction so that people can start using the protocol.”* – (Senior Specialist,  
465 Obstetrician/Gynecologist, Hospital - urban area).

466

467 ***Overconfidence*** - Some study participants believe that some MNCH/RCH service providers  
468 are over-confident given their familiarity with numerous protocols. This could also be a barrier.  
469 One Midwife in an urban hospital said:

470           *“It may happen at different places, due to familiarity, they think they already know” -*  
471           (Midwife, Hospital, Urban area).

472   **Staff rotation** - Another health system-related barrier mentioned by participants is the periodic  
473 rotation of health personnel from one unit to the other within the health facility. This becomes  
474 a challenge, given that one needs time to go through the protocol and grasp it. A senior Nursing  
475 Officer acknowledged:

476           *“One of the challenges is periodic reallocation of health professionals from one unit to*  
477 *the other. So, initially, when they come, it becomes a challenge for the child unit. You*  
478 *need to take them through the protocol, and it takes time before they grasp it.” - (Senior*  
479 *Nursing Officer, Hospital, urban area).*

480

481 Notwithstanding the barriers enumerated above, respondents were almost unanimous that they  
482 work hard to use evidence in their daily clinical decisions and that the quest for positive service  
483 outcomes, staff motivation or incentives, and in some instances the need to avoid unnecessary  
484 litigation constitute powerful incentives that keeps them persevering in the face of limitless  
485 constraints. This is well articulated in the quote from a respondent below.

486

487           *“What motivates us is that if there is any problem and you know that you did what*  
488 *you’re expected to do and therefore the law would let go of you. But if you don’t do it*  
489 *and there is a problem, then you can be held accountable for it.” - (Senior Nursing*  
490 *Officer, Hospital, Urban area).*

491

492   **Selecting, tailoring and implementing interventions**

493 The selection of evidence products (i.e., protocols guidelines etc.) is determined by the national  
494 level and cascaded through the different levels of the health system, with relevant training and  
495 logistics needed for implementation at the different levels. It is important to emphasize that  
496 detailed plans for implementing such evidence products are prepared at the health facility level  
497 in consultation with the community to ensure that implementation of the evidence product in  
498 question will be smooth and acceptable to encourage uptake. Using family planning, for  
499 example, participants narrated how new evidence products were selected, tailored and  
500 implemented. They indicated that a particular evidence product may for instance come from a  
501 Development Partner such as WHO or UNFPA and will first be adopted by GHS. During the  
502 adoption process, people with experience are tasked to look at the protocol and adapt it to suit  
503 local use, taking into consideration the kind of health services provided at each level. At each  
504 level of service provision, the protocol states what is expected to be done and the resources  
505 required. The adapted evidence product is then reproduced and disseminated in addition to  
506 training for those who will be using the evidence product in service provision. The trainer of  
507 trainer's approach is often used such that a few super users are trained at the regional level,  
508 who in turn train others in the districts, and cascade it to the health facility level.  
509  
510 After the training, the next level is the implementation of the evidence product. Participants  
511 interviewed suggest that the process is normally preceded by a meeting of the personnel  
512 supposed to be working with the evidence product. The meeting is normally to gather ideas  
513 that will make it relatively easy to implement the evidence product in a manner that works in  
514 the health facility. Following the meeting, detailed plans are put in place including assigning  
515 duties to health workers in the health facility. This is done in line with the objectives of the  
516 facility as well as plans put in place to monitor outcomes of the implementation, such that  
517 identified gaps can be identified and addressed.

518

## 519 **Monitoring Use of Evidence**

520 The study found that varied mechanisms are employed in monitoring the use of evidence  
521 products in MNCH/RCH service provision. These include the use of positive health outcomes,  
522 observations, and meetings (weekly, quarterly and monthly), the use of assessment indicators,  
523 either from clients' or health personnel's perspectives and the use of checklists for supervision.  
524 Other strategies recounted by participants were on-the-job training, reports (daily/monthly  
525 ward state), supervision (physical or supportive), mortality audit and research. Selected quotes  
526 from respondents have been reproduced below to emphasize this assertion.

527

528 *“The diseases we are immunizing against we are doing surveillance on it. So, if less*  
529 *cases being reported of those diseases then it means the immunization is working and*  
530 *by extension, the protocol being used.” - (Midwife, CHPS, Rural area).*

531

532 *“We have a checklist, and the supervisors do both physical monitoring and supportive*  
533 *supervision. So, when a protocol is introduced, you go from time to time to check*  
534 *whether staff are following it. This is done through some form of on-the-job training to*  
535 *ensure that they use it appropriately.” – (Senior Specialist, Obstetrician/Gynecologist,*  
536 *Hospital - Urban area).*

537

538 *“We have our daily wards state every morning that helps us to know whether we are*  
539 *making progress or not. For instance, if there is a mortality incidence, we will carry*  
540 *out an audit to find out what really went wrong. Was it our fault or was it the fault of*  
541 *the mother or something really went wrong? In such audits, we are thorough and also*

542 *take note of where we went wrong ... and then, next time we are cautious about it.”-*

543 (Senior Nursing Officer, Hospital - Urban area).

544

#### 545 **Sustaining Knowledge (Evidence Products) Use**

546 The study revealed that several approaches were used to sustain evidence of products use in  
547 MNCH/RCH service provision. Three themes emerged and these were empowerment,  
548 consultation and staff cooperation.

549

550 **Empowerment** - Study participants identified empowerment (teaching, sharing of ideas,  
551 training and continuous practice) as one of the key components of sustaining the use of  
552 evidence products in the provision of MNCH/RCH services. On the issue of teaching, a  
553 Principal Community Health Nurse in a rural health center had this to say:

554

555 *“As I said, we go to the workshop, we learn it and come back and then teach it.”*

556 (Principal Community Health Nurse, Health Centre, Rural area).

557

558 Recounting her experience on sharing of ideas, an Enrolled Nurse in an urban health center  
559 echoed:

560 *“When they go for workshop, when they come, we all sit down, and we share their*  
561 *ideas. So, the next time you also get a patient, you will also follow the same procedure,*  
562 *since it’s in line with the protocol that we have here” - (Enrolled Nurse, Health Centre,*  
563 *Urban area).*

564



565 Shedding more light on continuous practice as a way of sustaining the use of evidence, a  
566 Principal Nursing Officer in an urban hospital averred:

567 *“With time, practice makes perfect. If we are doing it gradually, we’ll get there. But if*  
568 *you are not using it at all, you wouldn’t know what it even entails, and you may forget*  
569 *some of the things in the protocol. So, I think continuous practice helps.”* – (Principal  
570 Nursing Officer, Hospital, Urban area).

571

572 **Consultation** - Another key factor that helps to sustain the use of evidence products in  
573 MNCH/RCH service provision cited by participants is consultation. The study established that  
574 consultation is done through weekly, monthly or quarterly meetings or workshops where issues  
575 are discussed, and knowledge is impacted through consensus building devoid of imposition.  
576 Sharing her experience in meetings, a Public Health Nurse in an urban hospital said:

577 *“When there is an emergency issue to be discussed, we call them. We also have*  
578 *scheduled meetings, like quarterly or monthly meetings. Then we discuss the issues. We*  
579 *don’t impose anything on anyone. We all share our knowledge on how and ways to*  
580 *improve.”* – (Public Health Nurse, Hospital, Urban area).

581

582 **Staff cooperation** - The study identified cooperation of health personnel through teamwork,  
583 good relationships and firmness as a strategy to sustain evidence products use in MNCH/RCH  
584 service provision. Participants argued that good relationship and teamwork creates the  
585 environment for sharing acquired knowledge/ideas and experiences among frontline staff. This  
586 sustains the use of evidence products in providing services. Again, being firm by insisting that  
587 frontline staff do the right thing, ensures protocol adherence and strengthens knowledge use in  
588 MNCH/RCH service provision. Participants said:

589 *“Sometimes we come together and talk about issues that constitute a common*  
590 *challenge. For example, someone goes to a workshop on preeclampsia, she will discuss*  
591 *what she learnt with those of us not at the workshop so that we will also learn some of*  
592 *what she learnt. If she also has anything new, she will discuss with us so that we will*  
593 *all know and do the work together.”* - (Midwife, Health Centre, Urban area).

594

595 The quote below from a nutrition officer from an urban hospital also emphasizes the issue of  
596 insisting that frontline staff make it their duty to do the right things first.

597 *“In fact, I try to be very firm. So, you have to be firm. You will sometimes be insulted,*  
598 *but once the insult will not kill someone’s child, I’m ok. If you insult me and the right*  
599 *thing is done and the child is ok, my heart is happy”* - (Nutrition Officer, Hospital,  
600 Urban area).

601

602

### 603 **Discussion**

604 The paper examined the nature of evidence products used by the frontline MNCH/RCH staff  
605 for practice decisions, their importance and the processes that facilitate their use. From the  
606 findings, evidence products in use cover a wide range of areas (family planning, postnatal,  
607 nutrition, antenatal, neonatal, adolescent health etc.) and were obtained from sources such as  
608 training, workshops, periodic facility-based meetings, schools, colleagues workers, online  
609 resources, development partners and parent organizations such as the Ghana Health Service  
610 and District Health Directorates. More importantly, frontline MNCH/RCH staff see the use of  
611 evidence products in practice decisions as essential not only for service providers but also for  
612 service users. Although there is no evidence to suggest that frontline MNCH/RCH staff follow  
613 the action cycle phase of the KTA framework in the same sequence as prescribed in theory, the

614 findings nonetheless, suggest that it constitutes a relevant theoretical model for understanding  
615 processes that facilitate the use of evidence products by frontline MNCH/RCH staff to inform  
616 practice decisions.

617

618 From the findings, frontline MNCH/RCH staff have put in place processes (evaluation of  
619 services, resources and feedback) to identify gaps that need to be addressed as suggested in the  
620 literature(7,20). These findings also indicate that frontline MNCH/RCH staff in the health  
621 facilities studied have adopted mechanisms to adapt evidence products and make them relevant  
622 to their context as prescribed in the KTA framework and other studies (21–23). The findings  
623 however suggest that such adaptations may not be straightforward as argued in theory (24).  
624 Depending on the context, there may be resources as well as administrative and community-  
625 level political implications for such adaptations. Thus, depending on the capacity of the health  
626 facility to navigate these constraints, such adaptations could be extremely difficult. This to  
627 some extent may reflect the caution by Fervers et al. (24) that adaption of evidence products to  
628 local context can result in a deviation of practice from the original evidence.

629

630 Additionally, the existing literature suggests that barriers to the use of evidence products  
631 emanate mostly from organisational systems (25,28,29). For example, barriers have been  
632 operationalized to reflect knowledge and attitudes (25), organizational support and  
633 organizational change (27), personal attitudes, availability of resources and knowledge and  
634 skills (28,29). Consistent with these studies, the findings suggest that health system barriers  
635 such as poor staff attitudes, resource constraints, limited staff numbers and skills, conflicting  
636 policies and inadequate training, constrain the use of evidence products by frontline  
637 MNCH/RC staff in their practice decisions. More importantly, the findings suggest that besides  
638 health system factors, there are client-level factors such as societal norms and belief systems,

639 poverty and education that strongly constrain the ability of frontline MNCH/RCH staff to  
640 deploy evidence-based practice. These findings can be crucial in informing the way  
641 interventions are deployed, knowing that strengthening health systems alone may not be  
642 enough to improve the use of evidence products by frontline health personnel.

643

644 Also, the findings of the study suggest that the selection and tailoring of evidence products are  
645 done mainly at higher levels of the administrative structure and that it is the implementation  
646 that is amenable to local-level participation and changes. This to some extent is different from  
647 the KTA framework, which argues that due to variation in context, it is appropriate not only to  
648 select but also to tailor interventions to suit local conditions to limit barriers to implementation  
649 (30). On this basis, one will expect that the evidence products selection process will reflect  
650 substantial input from those at the lower levels who have a better understanding of the context.  
651 This will ensure that both the selection and tailoring reflect local conditions to reduce to the  
652 barest minimum possible implementation barriers. There are several examples in the policy  
653 implementation literature where the need for substantial collaboration with all stakeholders  
654 especially those at the bottom shas been advocated as a strategy for improving the  
655 implementation of policies (31–34).

656 Theoretically, the essence of monitoring is to determine whether a change has taken place as a  
657 result of the use of evidence products, and if so, the extent of the change and the factors  
658 accounting for the change. Consistent with the KTA framework, the findings suggest that  
659 frontline MNCH/RCH staff deploy different mechanisms (health outcomes, observations,  
660 periodic meetings, use of assessment indicators either from clients or health personnel's  
661 perspectives, and the use of checklists for supervision etc.) to monitor the use of evidence  
662 products in practice decisions. Most importantly, the findings suggest that the monitoring  
663 system as per the requirement of the KTA framework makes it possible for evidence product

664 users to identify the extent of change occasioned by the use of evidence products. What is  
665 however not clear from the findings is whether the system deployed systematically collects  
666 data to help frontline MNCH/RCH staff to know the extent of change if any, and the factors  
667 responsible for same. For example, to what extent does the change fulfil the requirements of  
668 acceptability, appropriateness, fidelity, cost-effectiveness, penetration and sustainability as  
669 advocated for in the literature (35,36)?. Also, the findings do not suggest that in practice,  
670 evaluation is designed to specifically measure structural, process and outcome variation as  
671 articulated in the KTA framework. This constitutes a weakness in the evaluation mechanism  
672 deployed by the health facilities studied, given that any targeted intervention to address adverse  
673 outcomes may be difficult, if not impossible.

674 Finally, empowerment (ideas sharing, teaching, continuous practice), consultation (meetings,  
675 workshops, consensus building) and staff cooperation (teamwork, relationship building,  
676 firmness) approaches used by frontline MNCH/RCH staff to ensure sustainable use of evidence  
677 products in practice decisions is similar to the parameters of the original model by Graham et  
678 al., (18) as well as other applications of the original model (7,21,22). These models emphasised  
679 parameters (perceived benefits and risks, relevance, leadership, policy integration, resources  
680 and politics) that can help in scaling up knowledge use. Unlike empowerment, consultation  
681 and staff cooperation, the parameters emphasised by Graham et al., (18) are complex and may  
682 not be easily appreciated by practitioners and policymakers. Thus, it can be argued that the  
683 current study findings do not only offer a better operationalisation of existing frameworks for  
684 ensuring sustainable use of evidence products but also make them easy to appreciate and use,  
685 especially by practitioners and policymakers. For example, advocating for ideas sharing,  
686 teaching, continuous practice, consensus relationship building and firmness as a strategy to  
687 sustaining the use of evidence products among frontline health staff is straightforward to

688 identify with, compared with terms such as relevance, leadership, policy integration, resources  
689 and politics.

## 690 **Conclusion**

691 The study findings suggest that the use of evidence products is a pathway to improving  
692 maternal and child health outcomes. Thus, putting systems in place to strengthen the use of  
693 evidence products, especially at the health facility level is expected to not only consolidate the  
694 gains made over the last two decades but can also constitute a platform for seeking further  
695 improvements in outcomes.

696 The study findings also make clear the need to address challenges within the knowledge  
697 utilisation process and thus, provide clear adaptation guidance to prevent difficulties that arise  
698 from the complexity of the process. There is also the need to ensure that the process for  
699 selecting and tailoring knowledge is broad-based and benefits from substantial inputs from the  
700 lower levels to enhance relevance and adoption. Additionally, there will be the need to improve  
701 the monitoring framework to enhance acceptability, appropriateness, fidelity, penetration, cost-  
702 effectiveness and sustainability as advocated for by the KTA framework.

703 In addition, the study better operationalizes the KTA requirement for sustainability. For  
704 example, using concepts such as empowerment (ideas sharing, teaching, continuous practice),  
705 consultation (meetings, workshops, consensus building) and cooperation (teamwork,  
706 relationship building, firmness) simplifies the concept of knowledge sustainability and makes  
707 it easy for adoption and implementation, especially at the frontline. Besides the normal health  
708 systems factors that have been the focus of the knowledge translation and utilisation, individual  
709 (client) level factors are equally essential in addressing barriers to the utilisation of evidence  
710 products especially at the health facility level. Thus, interventions aimed at scaling up the use  
711 of evidence products in practice decisions by frontline staff should not only be aimed at

712 addressing health systems challenges but also challenges at the individual level. In this  
713 direction, interventions that rely on strong education to navigate societal norms and beliefs that  
714 inhibit the uptake of evidence-based care by clients will be essential in improving the use of  
715 evidence products to inform practice decisions by frontline MNCH/RCH staff.

716

717

718

719

720

721

722

723

724

725

726

727

728

729

730

731

732

733

734

735

736

## 737 **Acknowledgements**

738 The authors acknowledge the immense support of WAHO in carrying out the study and the  
739 report from which this paper was developed. We are also grateful to all who participated in this  
740 study.

## 741 **Author Contributions**

742 Conceptualization: GA, JE, SI, Data curation: GA, DO, RO Formal analysis: GA, DO, AAAB,  
743 Funding Acquisition: GA, Investigation: GA, DO, AAAB, SI, JE, Methodology: GA, DO, JE,  
744 SI, AAAB, RO. Project Administration: GA, RO Supervision: GA, Validation: GA, RO,  
745 Writing - original draft preparation: GA, RO, DO, Writing- review & editing: GA, RO, DO,  
746 JE, SI, AAAB

747

## 748 **References**

- 749 1. Nations U. Transforming Our World: The 2030 Agenda for Sustainable Development.  
750 . Nations U, editor. UN Publishing. New York2015.
- 751 2. (GSS) GSS, (GHS) GHS. Ghana Maternal Health Survey 2017. Accra, Ghana: Ghana  
752 Statistical Service, Ghana Health Service ; 2018.
- 753 3. Adu J. How do we improve maternal and child health outcomes in Ghana? Int J Health  
754 Plann Manage. 2023; doi: 10.1002/hpm.3639
- 755 4. Alqahtani JM, Carsula RP, Alharbi HA, Alyousef SM, Baker OG, Tumala RB.  
756 Barriers to implementing evidence-based practice among primary healthcare nurses in  
757 Saudi Arabia: A cross-sectional Study. Nurs Reports. 2022;12(2):313–23.
- 758 5. Dagne AH, Beshah MH. Implementation of evidence-based practice: The experience  
759 of nurses and midwives. PLoS One. 2021;16(8):e0256600.



- 760 6. Pitsillidou M, Roupa Z, Farmakas A, Noula M. Factors affecting the application and  
761 implementation of evidence-based practice in nursing. *Acta Inform Medica*.  
762 2021;29(4):281.
- 763 7. Russell DJ, Rivard LM, Walter SD, Rosenbaum PL, Roxborough L, Cameron D, et al.  
764 Using knowledge brokers to facilitate the uptake of pediatric measurement tools into  
765 clinical practice: a before-after intervention study. *Implement Sci*. 2010;5:1–17.
- 766 8. Gagliardi AR, Brouwers MC, Palda VA, Lemieux-Charles L, Grimshaw JM. An  
767 exploration of how guideline developer capacity and guideline implementability  
768 influence implementation and adoption: study protocol. *Implement Sci*. 2009;4(1):1–6.
- 769 9. Grimshaw J, Thomas R, MacLennan G, Fraser C, Ramsay CR, Vale L, et al.  
770 Effectiveness and efficiency of guideline dissemination and implementation strategies.  
771 2004;
- 772 10. Brown LC, Johnson JA, Majumdar SR, Tsuyuki RT, McAlister FA. Evidence of  
773 suboptimal management of cardiovascular risk in patients with type 2 diabetes mellitus  
774 and symptomatic atherosclerosis. *Cmaj*. 2004;171(10):1189–92.
- 775 11. Kendall E, Sunderland N, Muenchberger H, Armstrong K. When guidelines need  
776 guidance: considerations and strategies for improving the adoption of chronic disease  
777 evidence by general practitioners. *J Eval Clin Pract*. 2009;15(6):1082–90.
- 778 12. Dopson SUE, Fitzgerald L. The role of the middle manager in the implementation of  
779 evidence-based health care. *J Nurs Manag*. 2006;14(1):43–51.
- 780 13. McGlynn EA, Asch SM, Adams J, Keesey J, Hicks J, DeCristofaro A, et al. The  
781 quality of health care delivered to adults in the United States. *N Engl J Med*.  
782 2003;348(26):2635–45.

- 783 14. Rowe AK, De Savigny D, Lanata CF, Victora CG. How can we achieve and maintain  
784 high-quality performance of health workers in low-resource settings? *Lancet*.  
785 2005;366(9490):1026–35.
- 786 15. Oduro-Mensah E, Kwamie A, Antwi E, Amissah Bamfo S, Bainsong HM, Marfo B, et  
787 al. Care decision making of frontline providers of maternal and newborn health  
788 services in the greater Accra region of Ghana. *PLoS One*. 2013;8(2):e55610.
- 789 16. Owusu-Addo E, Cross R, Sarfo-Mensah P. Evidence-based practice in local public  
790 health service in Ghana. *Crit Public Health*. 2017;27(1):125–38.
- 791 17. Abekah-Nkrumah G, Ottie-Boakye D, Ermel J, Issiaka S. Determinants of evidence  
792 use by frontline maternal, newborn and child health staff in selected health facilities in  
793 Ghana. *Heal Res Policy Syst*. 2022;20(1):77.
- 794 18. Graham ID, Logan J, Harrison MB, Straus SE, Tetroe J, Caswell W, et al. Lost in  
795 knowledge translation: time for a map? *J Contin Educ Health Prof*. 2006;26(1):13–24.
- 796 19. Sibley KM, Salbach NM. Applying knowledge translation theory to physical therapy  
797 research and practice in balance and gait assessment: case report. *Phys Ther*.  
798 2015;95(4):579–87.
- 799 20. Tugwell PS, Santesso NA, O’Connor AM, Wilson AJ, Group ECI. Knowledge  
800 translation for effective consumers. *Phys Ther*. 2007;87(12):1728–38.
- 801 21. Molfenter SM, Ammoury A, Yeates EM, Steele CM. Decreasing the knowledge-to-  
802 action gap through research-clinical partnerships in speech-language pathology. 2009;
- 803 22. Hua D, Carter S, Bellerive J, Allu SO, Reid D, Tremblay G, et al. Bridging the gap:  
804 innovative knowledge translation and the Canadian hypertension education program.  
805 *Can J Cardiol*. 2012;28(3):258–61.

- 806 23. Stacey D, Higuchi KAS, Menard P, Davies B, Graham ID, O'Connor AM. Integrating  
807 patient decision support in an undergraduate nursing curriculum: an implementation  
808 project. *Int J Nurs Educ Scholarsh*. 2009;6(1).
- 809 24. Fervers B, Burgers JS, Voellinger R, Brouwers M, Browman GP, Graham ID, et al.  
810 Guideline adaptation: an approach to enhance efficiency in guideline development and  
811 improve utilisation. *BMJ Qual Saf*. 2011;20(3):228–36.
- 812 25. Majid S, Foo S, Luyt B, Zhang X, Theng Y-L, Chang Y-K, et al. Adopting evidence-  
813 based practice in clinical decision making: nurses' perceptions, knowledge, and  
814 barriers. *J Med Libr Assoc JMLA*. 2011;99(3):229.
- 815 26. Humphries S, Stafinski T, Mumtaz Z, Menon D. Barriers and facilitators to evidence-  
816 use in program management: a systematic review of the literature. *BMC Health Serv  
817 Res*. 2014;14(1):1–15.
- 818 27. Jordan P, Bowers C, Morton D. Barriers to implementing evidence-based practice in a  
819 private intensive care unit in the Eastern Cape. *South African J Crit Care*.  
820 2016;32(2):50–4.
- 821 28. Heiwe S, Kajermo KN, Tyni-Lenné R, Guidetti S, Samuelsson M, Andersson I-L, et  
822 al. Evidence-based practice: attitudes, knowledge and behaviour among allied health  
823 care professionals. *Int J Qual Heal Care*. 2011;23(2):198–209.
- 824 29. Rice K, Hwang J, Abrefa-Gyan T, Powell K. Evidence-based practice questionnaire: A  
825 confirmatory factor analysis in a social work sample. *Adv Soc Work*. 2010;11(2):158–  
826 73.
- 827 30. Crockett L. The Knowledge –to – Action Framework. 2017. Available from:  
828 <https://medium.com/knowledgenudge/kt-101-the-knowledge-to-action-framework->

829 7fbe399723e8

830 31. Koontz TM, Newig J. From planning to implementation: Top-down and bottom-up  
831 approaches for collaborative watershed management. *Policy Stud J.* 2014;42(3):416–  
832 42.

833 32. Ogunlayi F, Britton P. Achieving a ‘top-down’ change agenda by driving and  
834 supporting a collaborative ‘bottom-up’ process: case study of a large-scale enhanced  
835 recovery programme. *BMJ open Qual.* 2017;6(2):e000008.

836 33. Panisset U, Koehlmoos TP, Alkhatib AH, Pantoja T, Singh P, Kengey-Kayondo J, et  
837 al. Implementation research evidence uptake and use for policy-making. *Heal Res*  
838 *Policy Syst.* 2012;10:1–7.

839 34. Uvhagen H, Hasson H, Hansson J, von Knorring M. Leading top-down  
840 implementation processes: a qualitative study on the role of managers. *BMC Health*  
841 *Serv Res.* 2018;18:1–9.

842 35. Nilsen P. Making sense of implementation theories, models, and frameworks.  
843 *Implement Sci* 30. 2020;53–79.

844 36. Proctor E, Silmere H, Raghavan R, Hovmand P, Aarons G, Bunger A, et al. Outcomes  
845 for implementation research: conceptual distinctions, measurement challenges, and  
846 research agenda. *Adm policy Ment Heal Ment Heal Serv Res.* 2011;38:65–76.

847

848

849

850

medRxiv preprint doi: <https://doi.org/10.1101/2023.09.24.23296046>; this version posted September 25, 2023. The copyright holder for this preprint (which was not certified by peer review) is the author/funder, who has granted medRxiv a license to display the preprint in perpetuity. It is made available under a [CC-BY 4.0 International license](https://creativecommons.org/licenses/by/4.0/).

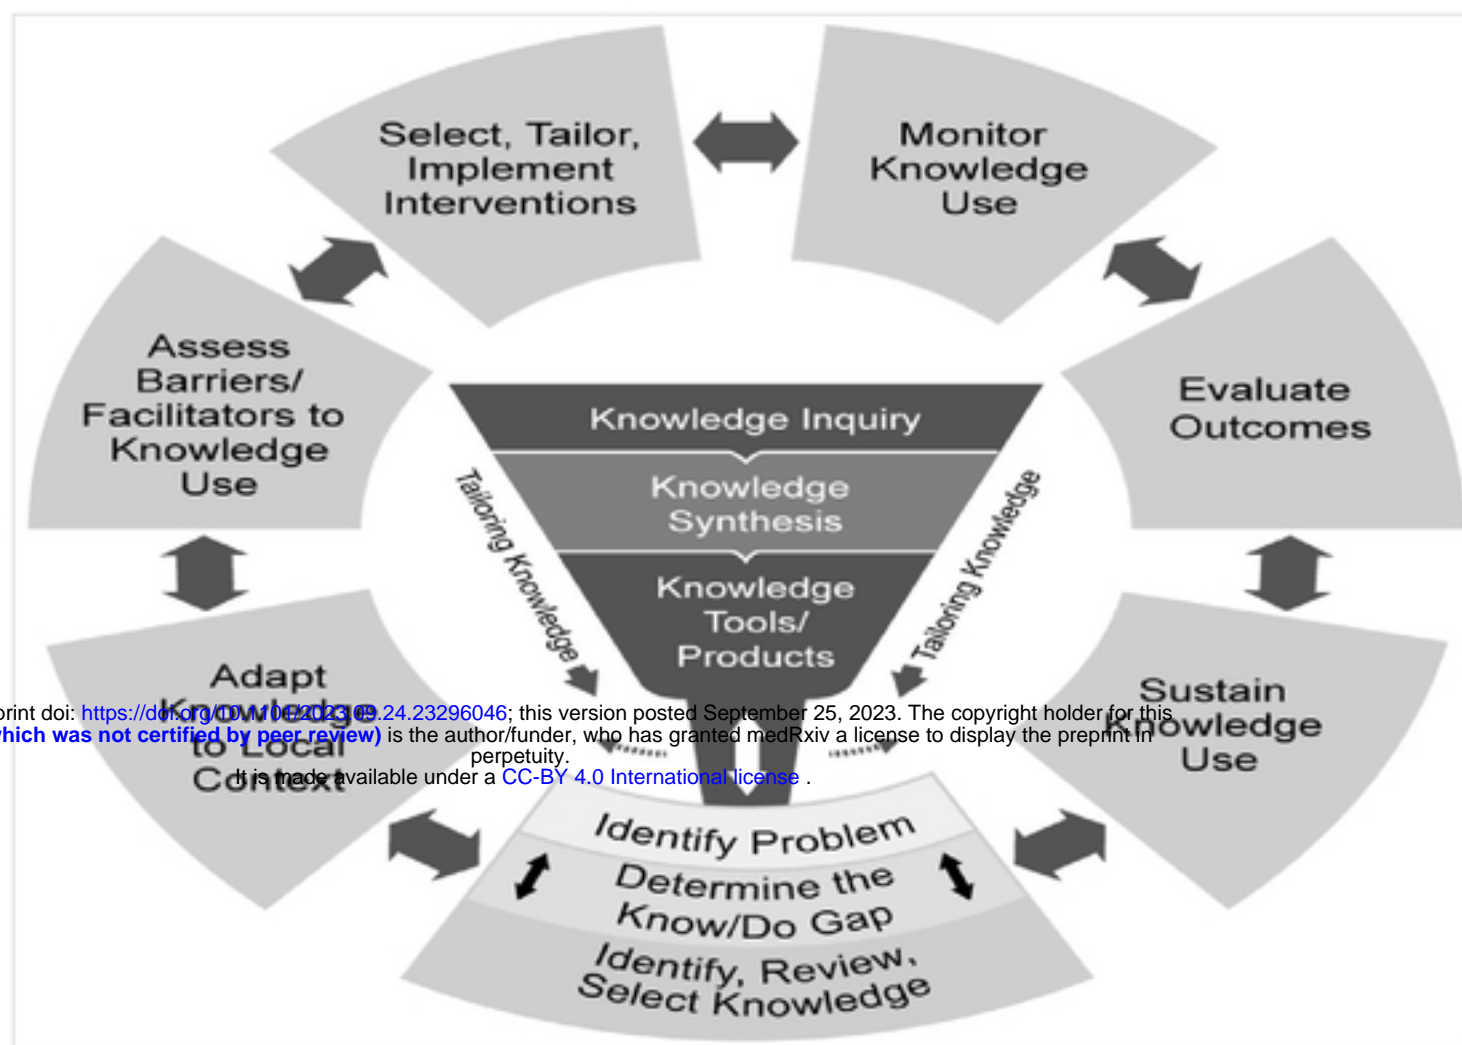

Figure 1
